# Supplementary material
Source: ML conference proceedings conference paper supplement (https://openaccess.thecvf.com/content/ICCV2021/html/Dai_Manifold_Matching_via_ICCV_2021_paper.html)
Supplement: Supplementary file 1 [file Dai_Manifold_Matching_via_ICCV_2021_supplemental.pdf]

# Manifold Matching via Deep Metric Learning for Generative Modeling – Supplementary Material

Mengyu Dai\*  
Microsoft

mendai@microsoft.com

Haibin Hang\*  
University of Delaware

haibin@udel.edu

Given any space  $X$  associated with a probability measure  $\mu$  s.t.  $\text{supp}[\mu] = X$  and  $p \geq 1$ , then for any function  $f : X \rightarrow \mathbb{R}$  we denote its  $L^p$  norm as

$$\|f\|_p := \left( \int_X |f(x)|^p d\mu(x) \right)^{1/p}.$$

Then we have the following properties:

**Lemma 0.1.** Denote  $\|f\|_\infty := \sup_{x \in X} f(x)$ , then

1. If  $p \leq q$ , then  $\|f\|_p \leq \|f\|_q$ ;
2.  $\lim_{p \rightarrow \infty} \|f\|_p = \|f\|_\infty$ .

*Proof.* Let  $r = q/p$  and  $s$  be such that  $1/r + 1/s = 1$ . Let  $a(x) = |f(x)|^p$  and  $b(x) \equiv 1$ , then by Holder's inequality, we have

$$\|ab\|_1 \leq \|a\|_r \|b\|_s$$

or

$$\int_{x \in X} |f(x)|^p d\mu(x) \leq \left( \int_{x \in X} |f(x)|^{p \cdot \frac{q}{p}} d\mu(x) \right)^{p/q}.$$

Now taking the  $p$ -th root on both sides we obtain  $\|f\|_p \leq \|f\|_q$ .

It is easy to see  $\|f\|_p \leq \|f\|_\infty$  for any  $p > 1$ . Now we choose  $\forall \epsilon > 0$  with  $\epsilon < \|f\|_\infty$  and let  $X_\epsilon := \{x \in X \mid f(x) \geq \|f\|_\infty - \epsilon\}$ , then

$$\begin{aligned} & \left( \int_{x \in X} |f(x)|^p d\mu(x) \right)^{1/p} \\ & \geq \left( \int_{X_\epsilon} (\|f\|_\infty - \epsilon)^p d\mu(x) \right)^{1/p} \\ & = (\|f\|_\infty - \epsilon) \mu(X_\epsilon)^{1/p} \end{aligned}$$

When  $p \rightarrow \infty$  we have  $\lim_{p \rightarrow \infty} \|f\|_p \geq \|f\|_\infty - \epsilon$ . Since  $\epsilon$  is arbitrary we have  $\lim_{p \rightarrow \infty} \|f\|_p \geq \|f\|_\infty$ .  $\square$

\*Equal contributions.

## 1. Properties of geometric descriptors

Given metric measure space  $\mathcal{X} = (X, d, \mu)$ , intuitively, the Fréchet mean set  $\sigma(\mathcal{X})$  represents the center of  $\mathcal{X}$  with respect to metric  $d$ . Particularly,

**Lemma 1.1.** The Fréchet mean of measure  $\mu$  with respect to  $d_E$  coincides with the mean  $\bar{\mu} := \int_{\mathbb{R}^D} y d\mu(y)$ .

*Proof.* Suppose that elements in  $\mathbb{R}^D$  are represented as column vectors. Then  $\sigma(\mathbb{R}^D, d, \mu)$  equals the set of minimizers of

$$F(x) = \int_{\mathbb{R}^D} (y - x)^T (y - x) d\mu(y).$$

Since  $\frac{\partial F}{\partial x} = -2 \int_{\mathbb{R}^D} y d\mu(y) + 2x$ , let  $\frac{\partial F}{\partial x} = 0$  we have single minimizer of  $F(x)$  to be  $\int_{\mathbb{R}^D} y d\mu(y) = \bar{\mu}$ .  $\square$

When the underlying metric  $d$  is not the Euclidean metric, the Fréchet mean provides a better option of centroid.

Let  $x_1, x_2, \dots, x_k, \dots$  be a sequence of independent identically distributed points sampled from  $\mu$ . Let  $\mu_k = \frac{1}{k} \sum_{i=1}^k \delta_{x_i}$  denote the empirical measure. We can estimate the Fréchet mean of  $(X, d, \mu)$  by a set of random samples:

**Proposition 1.2.**  $\sigma(\mathcal{X}) = \lim_{k \rightarrow \infty} \sigma(X, d, \mu_k)$ .

*Proof.* Since the empirical measure  $\mu_k$  weakly converges to  $\mu$ , the result following by the definition of weak convergence.  $\square$

The following lemma explains its geometric meaning of  $p$ -diameters:

**Lemma 1.3.** For any metric measure space  $\mathcal{X} := (X, d, \mu)$  with  $\text{supp}[\mu] = X$ ,

1.  $\text{diam}_p(\mathcal{X}) \leq \text{diam}_q(\mathcal{X})$  for any  $p \leq q$ ;
2.  $\lim_{p \rightarrow \infty} \text{diam}_p(\mathcal{X}) = \sup_{x, x' \in X} d(x, x')$ .

*Proof.* It follows directly from Lemma 0.1  $\square$

Similarly, we can estimate the  $p$ -diameter of a metric measure space  $\mathcal{X} := (X, d, \mu)$  by a set of random samples:

#### Proposition 1.4.

$$\text{diam}_p(\mathcal{X}) = \lim_{k \rightarrow \infty} \text{diam}_p(X, d, \mu_k).$$

*Proof.* Since the empirical measure  $\mu_k$  weakly converges to  $\mu$ , the result following by the definition of weak convergence.  $\square$

**Proposition 1.5.** *Given a metric measure space  $\mathcal{X} := (X, d, \mu)$  and map  $g : X \rightarrow \mathbb{R}^n$ . If  $d = g^* d_E$ , then*

$$\sigma(\mathcal{X}) = g^{-1}(\overline{g_*\mu}).$$

*Proof.* By definition,  $\sigma(\mathcal{X})$  is the set of minimizers of function

$$\begin{aligned} F(x) &:= \int_X (g^* d_E)^2(x, y) d\mu(y) \\ &= \int_X d_E^2(g(x), g(y)) d\mu(y) \\ &= \int_{\mathbb{R}^n} d_E^2(g(x), z) d(g_*\mu)(z). \end{aligned}$$

It is easy to see that  $x_0$  is a minimizer of  $F(x)$  iff.  $g(x_0)$  is a minimizer of  $G(w) := \int_{\mathbb{R}^n} d_E^2(w, z) d(g_*\mu)(z)$ . By Lemma 3.4,  $\overline{g_*\mu} = \text{argmin } G(w)$ , hence we have  $\sigma(\mathcal{X}) = \text{argmin } F(x) = g^{-1}(\overline{g_*\mu})$ .  $\square$

*Proof of Proposition 3.10.* It follows directly from Proposition 1.5  $\square$

## 2. Network Architectures

For unconditional image generation task, we used a ResNet data generator and a deep convolutional net metric generator:

$f_\theta$ : convt(128)  $\rightarrow$  upres(128)  $\rightarrow$  upres(128)  $\rightarrow$  upres(128)  $\rightarrow$  upres(128)  $\rightarrow$  bn  $\rightarrow$  conv(128)  $\rightarrow$  sig;

$g_w$ : conv(32)  $\rightarrow$  leaky-relu(0.2)  $\rightarrow$  conv(64)  $\rightarrow$  leaky-relu(0.2)  $\rightarrow$  conv(128)  $\rightarrow$  leaky-relu(0.2)  $\rightarrow$  conv(256)  $\rightarrow$  leaky-relu(0.2)  $\rightarrow$  conv(512)  $\rightarrow$  leaky-relu(0.2)  $\rightarrow$  maxpool  $\rightarrow$  dense(10).

For super-resolution task, the architecture of Triplet embedding network is presented as below:

$g_w$ : (conv(x $\rightarrow$ 2x,  $x_0=32$ )  $\rightarrow$  prelu  $\rightarrow$  maxpool) \* 7  $\rightarrow$  dense(256)  $\rightarrow$  prelu  $\rightarrow$  dense(256)  $\rightarrow$  prelu  $\rightarrow$  dense(32),

where conv, convt, upres, bn, relu, leaky-relu, prelu, maxpool, dense and sig refer to nn.Conv2d, nn.ConvTranspose2d, up-ResidualBlock, nn.BatchNorm2d, nn.ReLU, nn.LeakyReLU, nn.PReLU, nn.MaxPool2d, nn.Linear and nn.Sigmoid layers in Pytorch framework respectively.

## 3. More Evaluation Details

**Perception-Based Evaluations in SISR:** we adopted the function *nique* in Matlab for computing NIQE scores, and python package *lpips* for computing LPIPS.

**FID Evaluation:** we used 50000 randomly generated samples comparing against 50000 random samples from real data sets for testing. Features were extracted from the pool3 layer of a pre-trained Inception network. FID was computed over 10 bootstrap resamplings.
